# Supplementary material
Source: HighWire-hosted journal article supplement (https://bmjopen.bmj.com/content/15/1/e086799)
Supplement: inline-supplementary-material-2 [file inline-supplementary-material-2.pdf]

**Supplementary Table 1.** Clinical outcome assessments.

| Outcome                        | Measurement                   | Description                                                                                                                                                                             | Min-Max | Interpretation                                                                                                                          |
|--------------------------------|-------------------------------|-----------------------------------------------------------------------------------------------------------------------------------------------------------------------------------------|---------|-----------------------------------------------------------------------------------------------------------------------------------------|
| Neurocognitive function        | MoCA                          | Clinical screening tool for cognitive impairment. Assesses visuomotor, visuo-perceptual, task-switching ability, language, conceptual thinking, memory, and orientation <sup>50</sup> . | 0-30    | >26: normal<br><br>18-25: mild cognitive impairment<br><br>10-17: moderate cognitive impairment<br><br><10: severe cognitive impairment |
| Frailty                        | CFS                           | Clinical tool for evaluating frailty.                                                                                                                                                   | 1-9     | Higher = increased frailty and associated risks                                                                                         |
| Quality of life                | SF-36                         | A 36-item self-reported short form health survey to evaluate quality of life <sup>51</sup> .                                                                                            | 0-100   | Higher = better overall health status                                                                                                   |
| Health related quality of life | Health Utilities Index Mark 3 | Multi-attribute questionnaire covering 8 domains of health that define 972,000 unique                                                                                                   | 0 – 1   | 1 = perfect health<br><br>0= dead                                                                                                       |

|                           |         |                                                                                                                                                                                                                       |                                               |                                                                                                 |
|---------------------------|---------|-----------------------------------------------------------------------------------------------------------------------------------------------------------------------------------------------------------------------|-----------------------------------------------|-------------------------------------------------------------------------------------------------|
|                           |         | health states,<br>with<br>corresponding<br>population<br>derived<br>preference-based<br>utility weights.                                                                                                              |                                               |                                                                                                 |
| Anxiety and<br>depression | HADS    | A 14-question<br>instrument<br>measuring<br>anxiety and<br>depression, with<br>each question<br>scored on a scale<br>of 0-3 for a<br>maximum of 21<br>points for each of<br>anxiety and<br>depression <sup>52</sup> . | 0-21                                          | Higher = higher distress                                                                        |
| PTSD                      | PTSS-14 | Screening<br>questionnaire for<br>post-traumatic<br>stress disorder,<br>validated in ICU<br>patients <sup>34</sup> .                                                                                                  | 14-98                                         | ≥45 = PTSD                                                                                      |
| Chronic pain              | CPGS    | A 7-item valid<br>and reliable tool<br>for assessing<br>pain intensity                                                                                                                                                | 0-100 for<br>Characteristic Pain<br>Intensity | Grade 0 = pain-free<br><br>Grade I = Characteristic Pain<br>Intensity <50, <3 disability points |

|                 |                    |                                                                                                                     |                                                                                                                                                                                                                                                                                                                                                                             |                                                                                                                                                                                                                                                                            |
|-----------------|--------------------|---------------------------------------------------------------------------------------------------------------------|-----------------------------------------------------------------------------------------------------------------------------------------------------------------------------------------------------------------------------------------------------------------------------------------------------------------------------------------------------------------------------|----------------------------------------------------------------------------------------------------------------------------------------------------------------------------------------------------------------------------------------------------------------------------|
|                 |                    | and pain-related disability in chronic pain conditions <sup>35</sup> .                                              | <p>0-100 Disability Score</p> <p>Disability points =</p> <p>Disability days + disability score points</p> <p>Disability days:</p> <p>0-6 days = 0 points</p> <p>7-14 days = 1 point</p> <p>15-30 days = 2 points</p> <p>31+ days = 3 points</p> <p>Disability score points:</p> <p>0-29 = 0 points</p> <p>30-49 = 1 point</p> <p>50-69 = 2 points</p> <p>70+ = 3 points</p> | <p>Grade II = Characteristic Pain Intensity <math>\geq 50</math>, &lt;3 disability points</p> <p>Grade III = 3-4 disability points irrespective of Characteristic Pain Intensity</p> <p>Grade IV = 5-6 disability points irrespective of Characteristic Pain Intensity</p> |
| Chronic fatigue | FSS                | A 9-item scale evaluating severity of fatigue and its effect on a person's lifestyle and activities <sup>53</sup> . | 9-63                                                                                                                                                                                                                                                                                                                                                                        | <p>&lt;36 = may not be suffering from fatigue</p> <p><math>\geq 36</math> = may need further evaluation</p>                                                                                                                                                                |
| ADLs            | Katz Index of ADLs | A 6-item scale evaluating performance on ADLs <sup>54</sup> .                                                       | 0-6                                                                                                                                                                                                                                                                                                                                                                         | <p>0 = low (very dependent)</p> <p>6 = high (independent)</p>                                                                                                                                                                                                              |
| IADLs           | Lawton IADL        | Assessment of                                                                                                       | 0-8 for women                                                                                                                                                                                                                                                                                                                                                               | 0 = low function, dependent                                                                                                                                                                                                                                                |

|                          | scale                 | functional status through IADLs <sup>38</sup> .                                                                                                                                                                                                                                                                                                                                                                                | 0-5 for men                                                                                                                                                                                                                                                                                                                                                                                                         | 8 (women) or 5 (men) = high function, independent |   |   |       |    |    |       |    |    |       |    |    |       |    |    |       |    |   |       |   |   |       |   |   |                                   |
|--------------------------|-----------------------|--------------------------------------------------------------------------------------------------------------------------------------------------------------------------------------------------------------------------------------------------------------------------------------------------------------------------------------------------------------------------------------------------------------------------------|---------------------------------------------------------------------------------------------------------------------------------------------------------------------------------------------------------------------------------------------------------------------------------------------------------------------------------------------------------------------------------------------------------------------|---------------------------------------------------|---|---|-------|----|----|-------|----|----|-------|----|----|-------|----|----|-------|----|---|-------|---|---|-------|---|---|-----------------------------------|
| Lower extremity strength | 30s Sit-To-Stand Test | Participant is seated with their back straight and feet on the floor shoulder-width apart, with one foot slightly in front of the other to maintain balance. The participant's arms are held against the chest, while their wrists are crossed. The participant then stands and re-sits as many times as possible during a 30-second period. This task can be performed either remotely or in-person but will be performed in- | Average scores by age group and sex: <table><tr><th>Age</th><th>M</th><th>F</th></tr><tr><td>60-64</td><td>14</td><td>12</td></tr><tr><td>65-69</td><td>12</td><td>11</td></tr><tr><td>70-74</td><td>12</td><td>10</td></tr><tr><td>75-79</td><td>11</td><td>10</td></tr><tr><td>80-84</td><td>10</td><td>9</td></tr><tr><td>85-89</td><td>8</td><td>8</td></tr><tr><td>90-94</td><td>7</td><td>4</td></tr></table> | Age                                               | M | F | 60-64 | 14 | 12 | 65-69 | 12 | 11 | 70-74 | 12 | 10 | 75-79 | 11 | 10 | 80-84 | 10 | 9 | 85-89 | 8 | 8 | 90-94 | 7 | 4 | Below average = higher falls risk |
| Age                      | M                     | F                                                                                                                                                                                                                                                                                                                                                                                                                              |                                                                                                                                                                                                                                                                                                                                                                                                                     |                                                   |   |   |       |    |    |       |    |    |       |    |    |       |    |    |       |    |   |       |   |   |       |   |   |                                   |
| 60-64                    | 14                    | 12                                                                                                                                                                                                                                                                                                                                                                                                                             |                                                                                                                                                                                                                                                                                                                                                                                                                     |                                                   |   |   |       |    |    |       |    |    |       |    |    |       |    |    |       |    |   |       |   |   |       |   |   |                                   |
| 65-69                    | 12                    | 11                                                                                                                                                                                                                                                                                                                                                                                                                             |                                                                                                                                                                                                                                                                                                                                                                                                                     |                                                   |   |   |       |    |    |       |    |    |       |    |    |       |    |    |       |    |   |       |   |   |       |   |   |                                   |
| 70-74                    | 12                    | 10                                                                                                                                                                                                                                                                                                                                                                                                                             |                                                                                                                                                                                                                                                                                                                                                                                                                     |                                                   |   |   |       |    |    |       |    |    |       |    |    |       |    |    |       |    |   |       |   |   |       |   |   |                                   |
| 75-79                    | 11                    | 10                                                                                                                                                                                                                                                                                                                                                                                                                             |                                                                                                                                                                                                                                                                                                                                                                                                                     |                                                   |   |   |       |    |    |       |    |    |       |    |    |       |    |    |       |    |   |       |   |   |       |   |   |                                   |
| 80-84                    | 10                    | 9                                                                                                                                                                                                                                                                                                                                                                                                                              |                                                                                                                                                                                                                                                                                                                                                                                                                     |                                                   |   |   |       |    |    |       |    |    |       |    |    |       |    |    |       |    |   |       |   |   |       |   |   |                                   |
| 85-89                    | 8                     | 8                                                                                                                                                                                                                                                                                                                                                                                                                              |                                                                                                                                                                                                                                                                                                                                                                                                                     |                                                   |   |   |       |    |    |       |    |    |       |    |    |       |    |    |       |    |   |       |   |   |       |   |   |                                   |
| 90-94                    | 7                     | 4                                                                                                                                                                                                                                                                                                                                                                                                                              |                                                                                                                                                                                                                                                                                                                                                                                                                     |                                                   |   |   |       |    |    |       |    |    |       |    |    |       |    |    |       |    |   |       |   |   |       |   |   |                                   |

|                  |                                                                  |                                                                                                                           |      |                                                                                                                             |
|------------------|------------------------------------------------------------------|---------------------------------------------------------------------------------------------------------------------------|------|-----------------------------------------------------------------------------------------------------------------------------|
|                  |                                                                  | person for the purposes of this study to ensure accurate reporting.                                                       |      |                                                                                                                             |
| Adverse events   | # hospital and ICU readmissions<br># emergency department visits | Evaluation of adverse events including hospital and ICU readmissions and emergency department visits among ICU survivors. |      |                                                                                                                             |
| Polypharmacy     | # concurrent medications                                         | Evaluation of polypharmacy through the number of concurrent medications that a patient is prescribed.                     |      |                                                                                                                             |
| Caregiver burden | CBS                                                              | 22-item scale evaluating burden on caregivers of individuals with chronic illness across a variety                        | 0-88 | 0-20 = little or no burden<br>21-40 = mild to moderate burden<br>41-60 = moderate to severe burden<br>61-88 = severe burden |

|                                |                                               |                                                                                         |      |                                                    |
|--------------------------------|-----------------------------------------------|-----------------------------------------------------------------------------------------|------|----------------------------------------------------|
|                                |                                               | of domains of functioning <sup>55</sup> .                                               |      |                                                    |
| Sleep quality                  | PSQI                                          | Self-reported scale assessing sleep quality over the previous one month <sup>42</sup> . | 0-21 | ≤5 = good sleep quality<br>>5 = poor sleep quality |
| Dyadic resiliency to stressors | Connor Davidson Resilience Scale (CD-RISC-10) | A dyadic measure of resilience among both participants and caregivers.                  | 0-40 | Higher score = higher resilience                   |
